# Supplementary material for: The First Whole Genome Sequence Discovery of the Devastating Fungus Arthrinium rasikravindrae
Source: MDPI journal article supplement (doi:10.3390/jof8030255), 2022-03-02
Supplement: s1 [file s1]

# The First Whole Genome Sequence Discovery of the Devastating Fungus

## *Arthrinium rasikravindrae*

### Supplementary data

#### Table of content

| <b>Supplement Fig/Table#</b> | <b>Tittle of figure</b>                                             | <b>Page #</b> |
|------------------------------|---------------------------------------------------------------------|---------------|
| Supplementary Table S1       | Statistical assembly summary for comparative fungal<br>genomes..... | 01            |
| Supplementary Figure S1      | NR annotation of species.....                                       | 01            |
| Supplementary Figure S2      | TCBD functional classification.....                                 | 02            |
| Supplementary Figure S3      | Carbohydrate enzyme classification and annotation.                  | 02            |
| Supplementary Figure S4      | Secondary metabolic gene Cluster.....                               | 03            |
| Supplementary Figure S5      | PHI phenotype classification.....                                   | 04            |

**Supplementary Table S1.** Statistical assembly summary for comparative fungal genomes.

| <b>Species</b>                     | <b>Naming</b> | <b>Accession number in Gene<br/>Bank</b> | <b>Total Length<br/>(MB)</b> | <b>GC (%)</b> | <b>N50</b> | <b>Scaffolds</b> | <b>Contigs</b> |
|------------------------------------|---------------|------------------------------------------|------------------------------|---------------|------------|------------------|----------------|
| <i>Arthrinium<br/>phaeospermum</i> | AP-Z13        | QYRS000000000.1                          | 48.45                        | 53.05         | 3,733,262  | 19               | 19             |
| <i>Arthrinium malaysianum</i>      | STlab-iicb    | QUSE000000000.1                          | 46.11                        | 52.50         | 336,634    | 43               | 266            |
| <i>Fusarium proliferatum</i>       | ET1           | FJOF000000000                            | 45.21                        | 48.50         | 3,311,891  | 32               | 17             |
| <i>Fusarium oxysporum</i>          | FO2           | AAXH000000000.1                          | 61.38                        | 48.42         | 95,416     | 114              | 1362           |

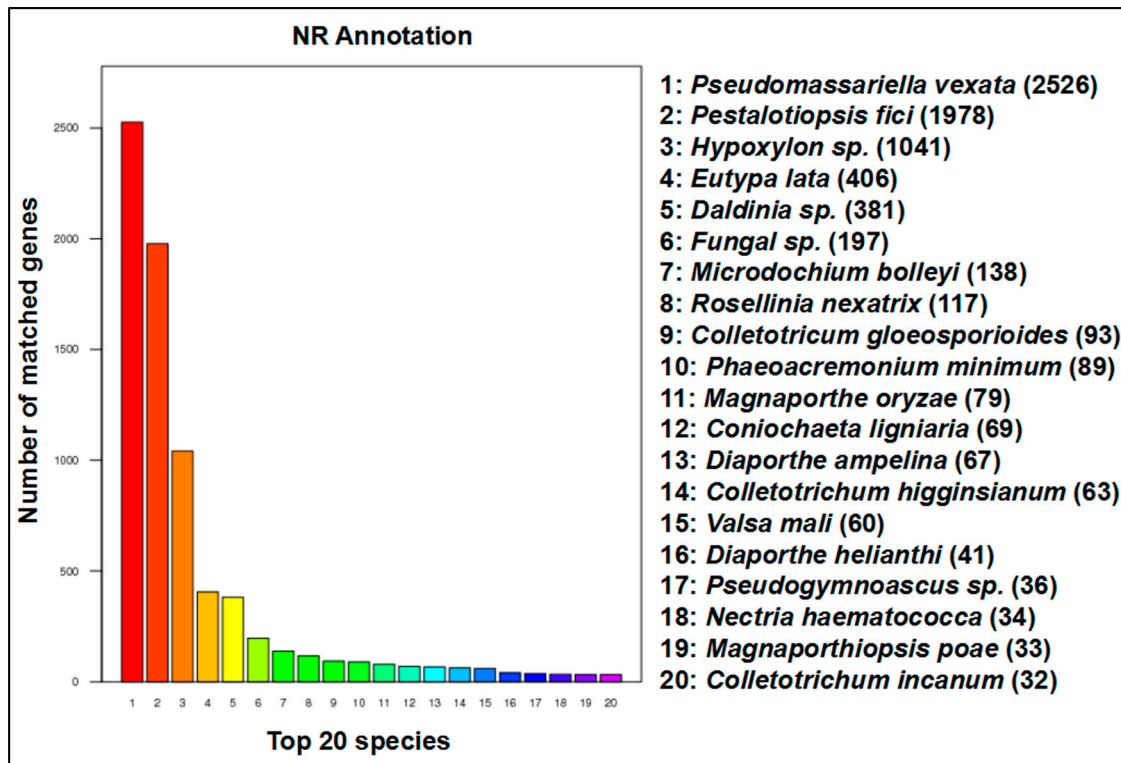

**Supplementary Figure S1. NR annotation of species.** In this figure, X-axis represents the top 20 species from 1-20, while the Y axis represents the number of matched genes between the species with a scale up to 2500. NR annotation is divided into 20 classes. Different colors depict top 20 species, their names, and values.

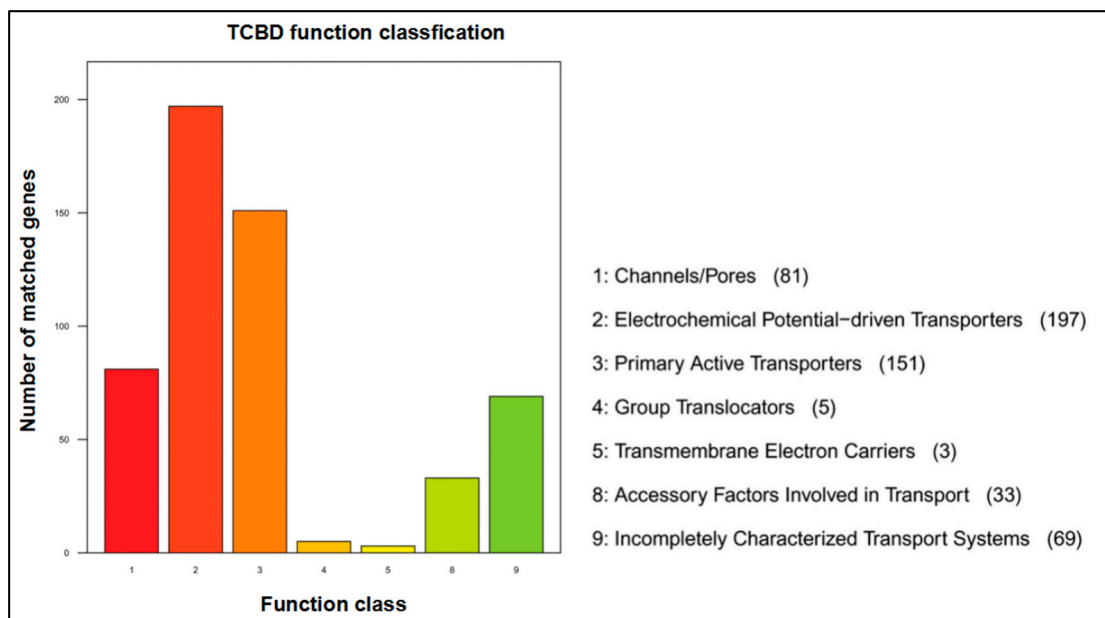

**Supplementary Figure S2. TCBD functional classification.** In this figure, X-axis represents the functional class & the Y-axis shows the number of matched genes, (a) TCBD functional classification 1-5, 8, and 9 class with different colors, functional class numbers, names, and values.

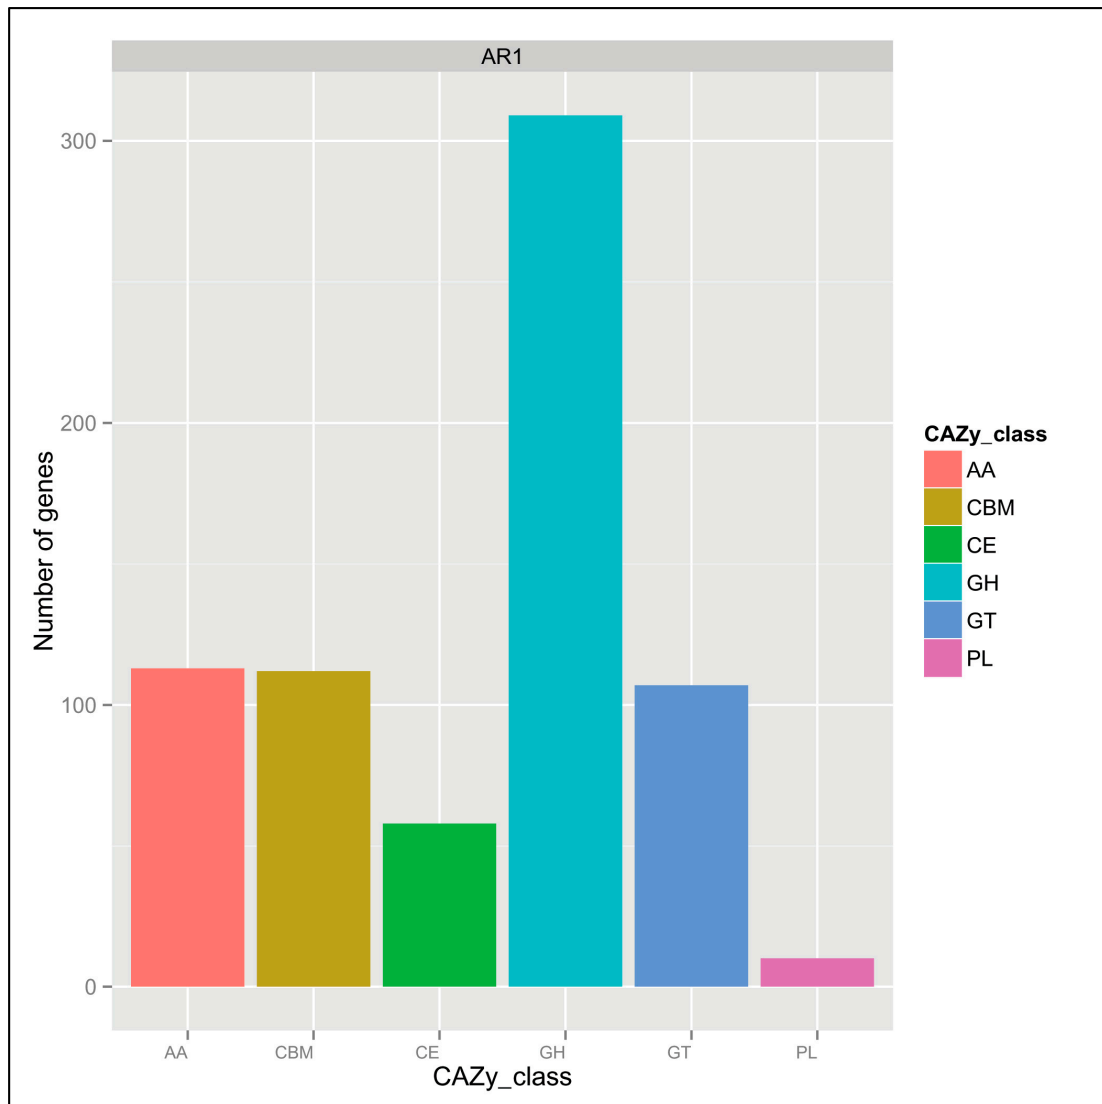

**Supplementary Figure S3. Carbohydrate enzyme classification and annotation.**

In this figure X-axis shows the CAZy\_class with their names as shown in different colors and Y-axis denotes the genes number of genes with a scale of 300, while it is divided into 6 classes (AA), (CBM), (CE), (GH), (GT) and (PL).

Note: AR1= *Arthrinium rasikravindraae* 1.

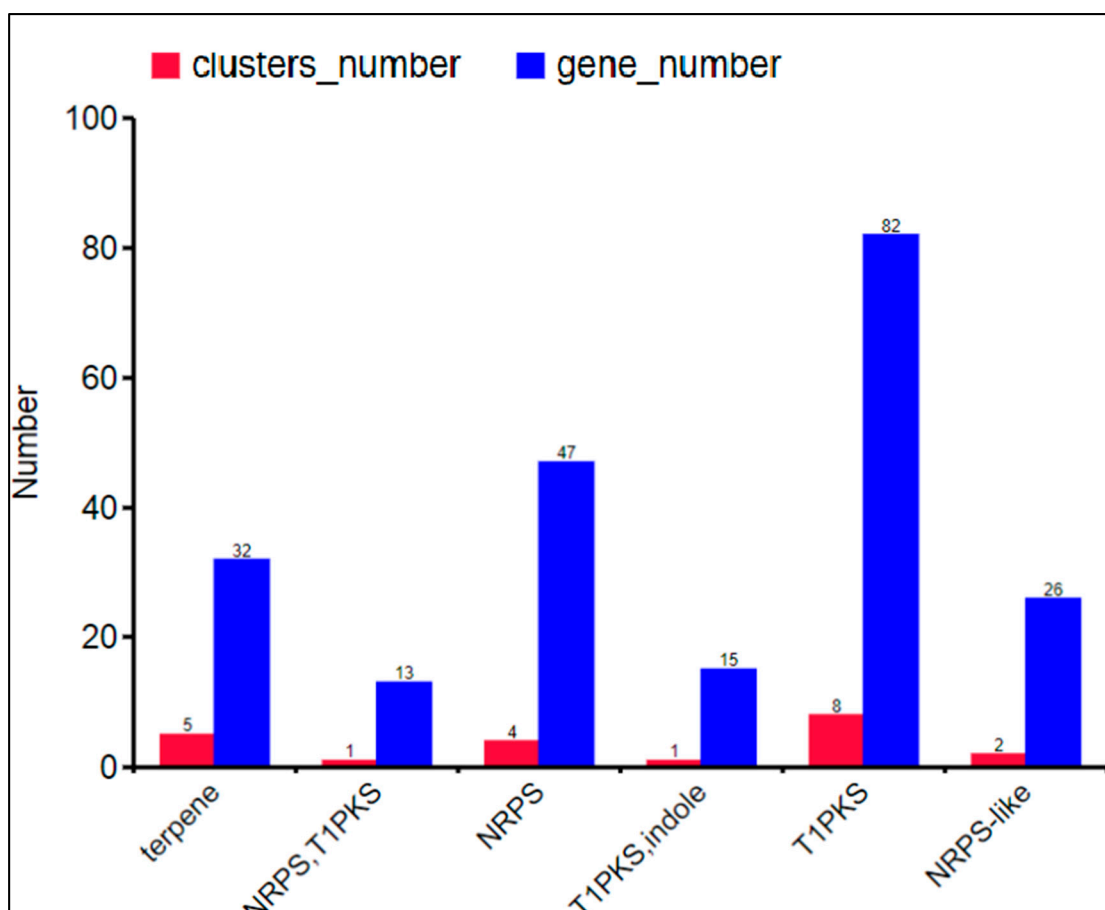

**Supplementary Figure S4. Secondary metabolic gene Cluster.** In this figure two different colors are shown, red color indicates the cluster number and blue color represents the gene number, while the X-axis denotes the type of cluster and their names, and the Y-axis shows gene numbers with a scale from 0-100.

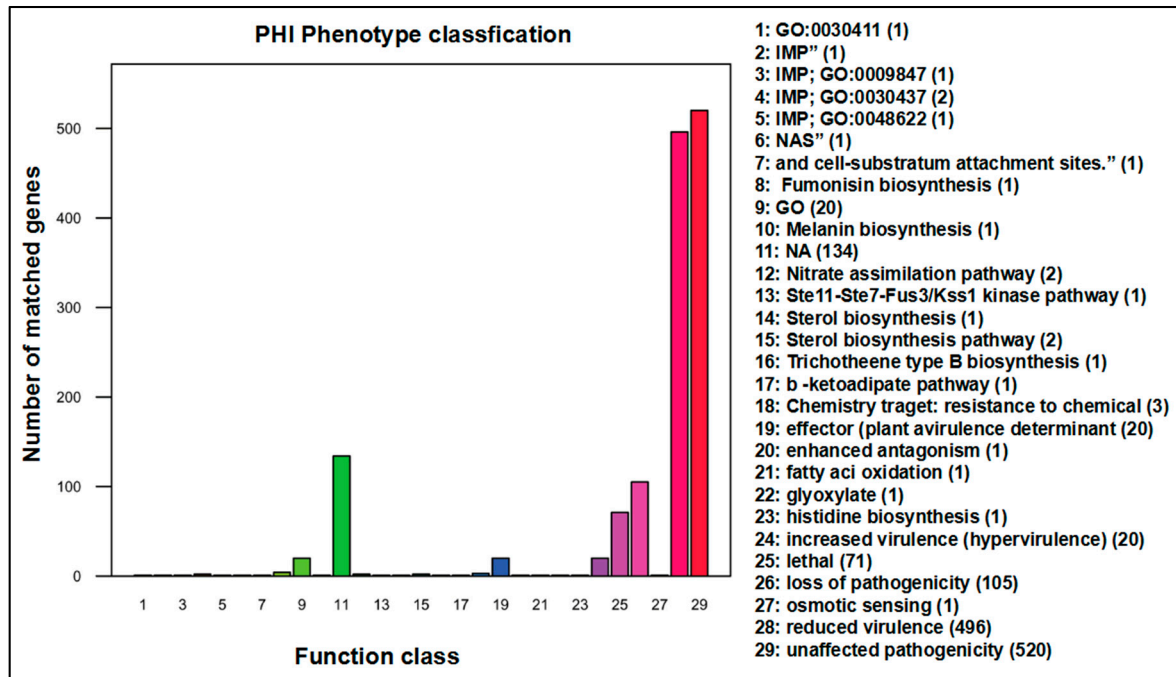

**Supplementary Figure S5. PHI phenotype classification.** In this figure, X-axis shows the function class with their class number and Y-axis shows the number of matched genes. PHI Phenotype classification shows 29 functional classes, functional class number and their names.
